# Supplementary material for: Combined sulfating and non-sulfating support to prevent water and sulfur poisoning of Pd catalysts for methane combustion
Source: Royal Society of Chemistry journal article supplement (doi:10.1039/c0cc00723d), 2010-01-01
Supplement: c0cc00723d.pdf [file c0cc00723d.pdf]

Supplementary Material (ESI) for Chemical Communications  
This journal is (c) The Royal Society of Chemistry 2010

## Electronic supplementary information (ESI)

# Combined sulfating and non-sulfating support to prevent water and sulfur poisoning of Pd catalysts

Gabriella Di Carlo<sup>\*a</sup>, G r me Melaet<sup>b</sup>, Norbert Kruse<sup>b</sup>, Leonarda F. Liotta<sup>c</sup>,  
Giuseppe Pantaleo<sup>c</sup> and Anna M. Venezia<sup>c</sup>

<sup>a</sup> Istituto per lo Studio dei Materiali Nanostrutturati (ISMN) - CNR, Via Salaria km 29300, 00015 Monterotondo Stazione, Roma, Italy. E-mail: gabriella.dicarlo@ismn.cnr.it

<sup>b</sup> Universit  Libre de Bruxelles (ULB) Chemical Physics of Materials, Campus de la Plaine, C.P. 243, Bld du Triomphe, B-1050 Bruxelles, Belgium. E-mail: gerome.melaet@ulb.ac.be

<sup>c</sup> Istituto per lo Studio dei Materiali Nanostrutturati (ISMN) - CNR, Via Ugo La Malfa 153, 90146 Palermo, Italy.

## Experimental

### *Preparation of the catalyst:*

The precursors were mixed in appropriate amounts and refluxed under stirring at 80  C. An aqueous solution of acetic acid at pH 5 was added at 80  C in order to catalyse the simultaneous hydrolysis of both precursors. The gel was kept at this temperature for 1 h and then dried at 110  C for 6 h in order to remove the solvent. The product was finally calcined at 450  C for 4 h.

Then, palladium (1 wt.%) was deposited over the mixed oxide by impregnation using an aqueous solution of palladium nitrate. The sample was dried at 120  C overnight and calcined at 400  C for 4 h.

### *Equipments for the catalytic tests:*

The inlet and outlet gas composition was analyzed by online mass quadrupole spectrometer (Thermostar, Balzers). IR analyzers (ABB Uras 14 and 26) were used for monitoring CO, CO<sub>2</sub> and CH<sub>4</sub> and a paramagnetic analyzer (ABB Magnos 206) for monitoring O<sub>2</sub>.

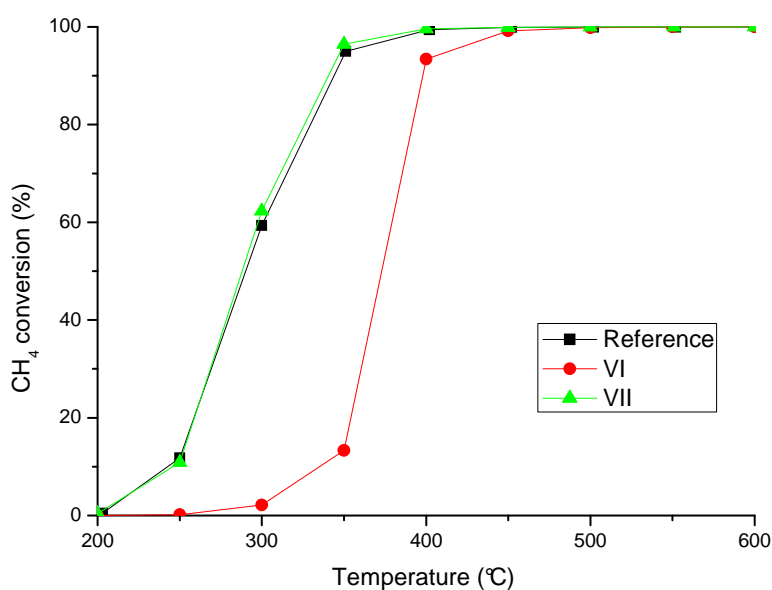

**Fig. S1:** Influence of an overnight treatment with  $\text{H}_2\text{O} + \text{SO}_2$  on the conversion of methane: Reference curve obtained for Pd/TiO<sub>2</sub>(10%)-SiO<sub>2</sub> (lean burn conditions), curve VI (1<sup>st</sup> run after the overnight treatment), curve VII (2<sup>nd</sup> run after the overnight treatment)

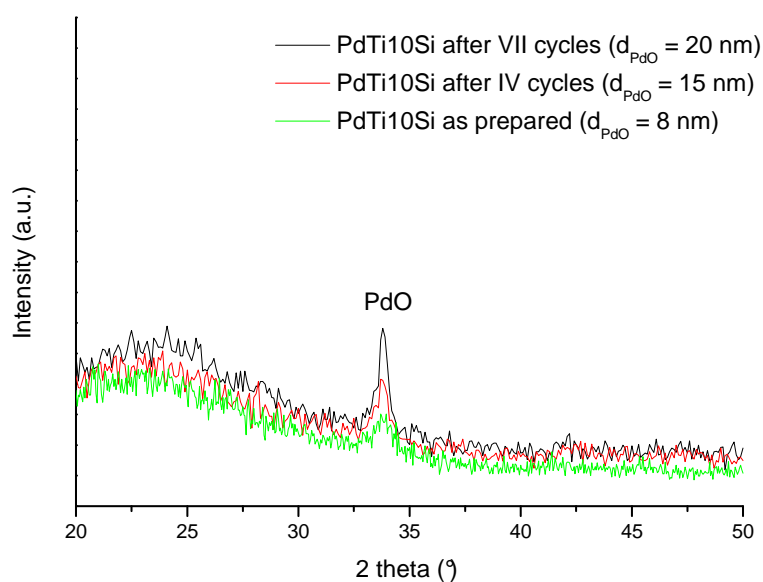

**Fig. S2:** XRD pattern of Pd/TiO<sub>2</sub>(10%)-SiO<sub>2</sub>: the peak centered on 34° is corresponding to PdO(101) while the broad peak centered on 23° can be attributed to amorphous SiO<sub>2</sub>.
